# Supplementary material for: Quinoa for the Brazilian Cerrado: Agronomic Characteristics of Elite Genotypes under Different Water Regimes
Source: MDPI journal article supplement (doi:10.3390/plants10081591), 2021-08-02
Supplement: s1 [file s1]

**Table S2.** Proline content ( $\mu \text{ mol g}^{-1} \text{ FM}$ ) in leaves of four quinoa genotypes (CPAC4, CPAC 9, CPAC 11 e BRS Piabiru Precoce) under four water regimes (150, 247, 389, 480 mm).

| <b>Genotypes</b> | <b>Water Regime (mm)</b> |            |            |            |
|------------------|--------------------------|------------|------------|------------|
|                  | <b>150</b>               | <b>247</b> | <b>389</b> | <b>480</b> |
| CPAC4            | 0.09bA                   | 0.07aAB    | 0.06aB     | 0.07abAB   |
| CPAC 11          | 0.13aA                   | 0.07aB     | 0.06aC     | 0.05bC     |
| Piabiru          | 0.11abA                  | 0.08aAB    | 0.07aB     | 0.07abB    |
| CPAC 19          | 0.11abA                  | 0.09aA     | 0.09aA     | 0.09aA     |

Means followed by the same lowercase letter (column) or uppercase letter (line), do not differ according to the Tukey test at 5% probability.
