# Supplementary material for: Quinoa for the Brazilian Cerrado: Agronomic Characteristics of Elite Genotypes under Different Water Regimes
Source: MDPI journal article supplement (doi:10.3390/plants10081591), 2021-08-02
Supplement: s1 [file s1]

**Table S1.** Chlorophyll *a*, *b*, *a/b* or *a+b* measured in four quinoa genotypes independent of water regime (150, 247, 389 and 480 mm).

| <b>Genotype</b> | <b>Chlorophyll <i>a</i></b> | <b>Chlorophyll <i>b</i></b> | <b>Chlorophyll <i>a/b</i></b> | <b>Chlorophyll <i>a+b</i></b> |
|-----------------|-----------------------------|-----------------------------|-------------------------------|-------------------------------|
| CPAC4           | 44.1b                       | 14.4a                       | 3.13a                         | 59.1bc                        |
| CPAC11          | 43.7c                       | 16.5a                       | 3.28a                         | 57.4c                         |
| BRS Piabiru     | 45.0ab                      | 16.5a                       | 2.90a                         | 61.4b                         |
| CPAC19          | 45.4a                       | 18.9a                       | 2.27b                         | 66.0a                         |

Means followed by the same lowercase letter (column) or uppercase letter (line), do not differ according to the Tukey test at 5% probability.
