# Supplementary figures and images for: Quinoa for the Brazilian Cerrado: Agronomic Characteristics of Elite Genotypes under Different Water Regimes
Source: MDPI journal article supplement (doi:10.3390/plants10081591), 2021-08-02

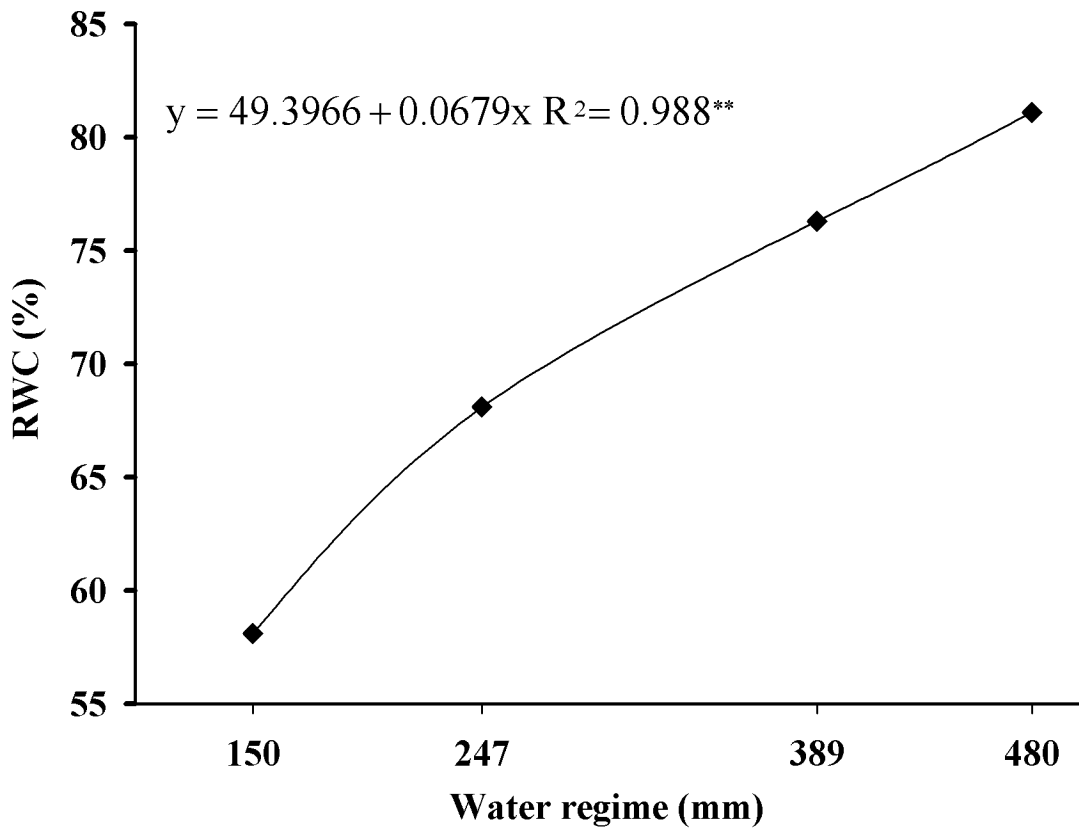

Supplement: s1 [file s1]

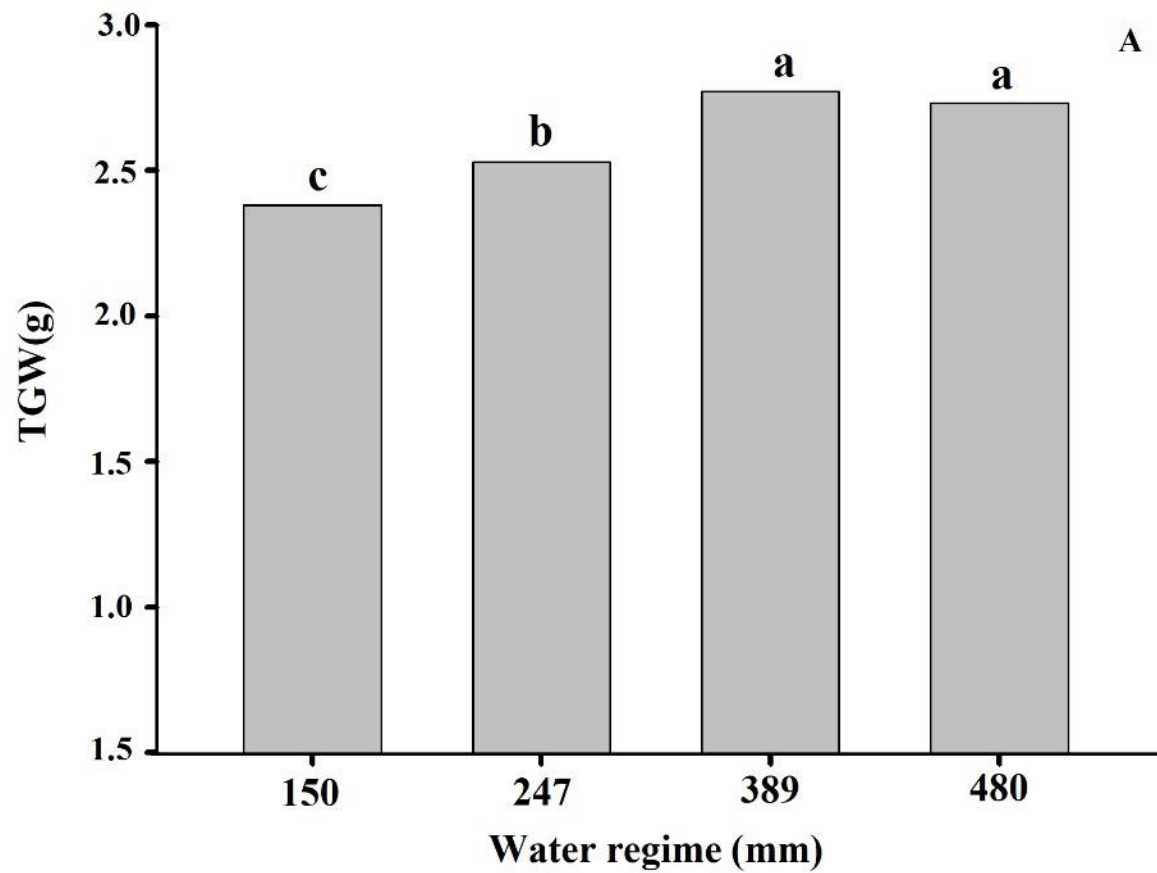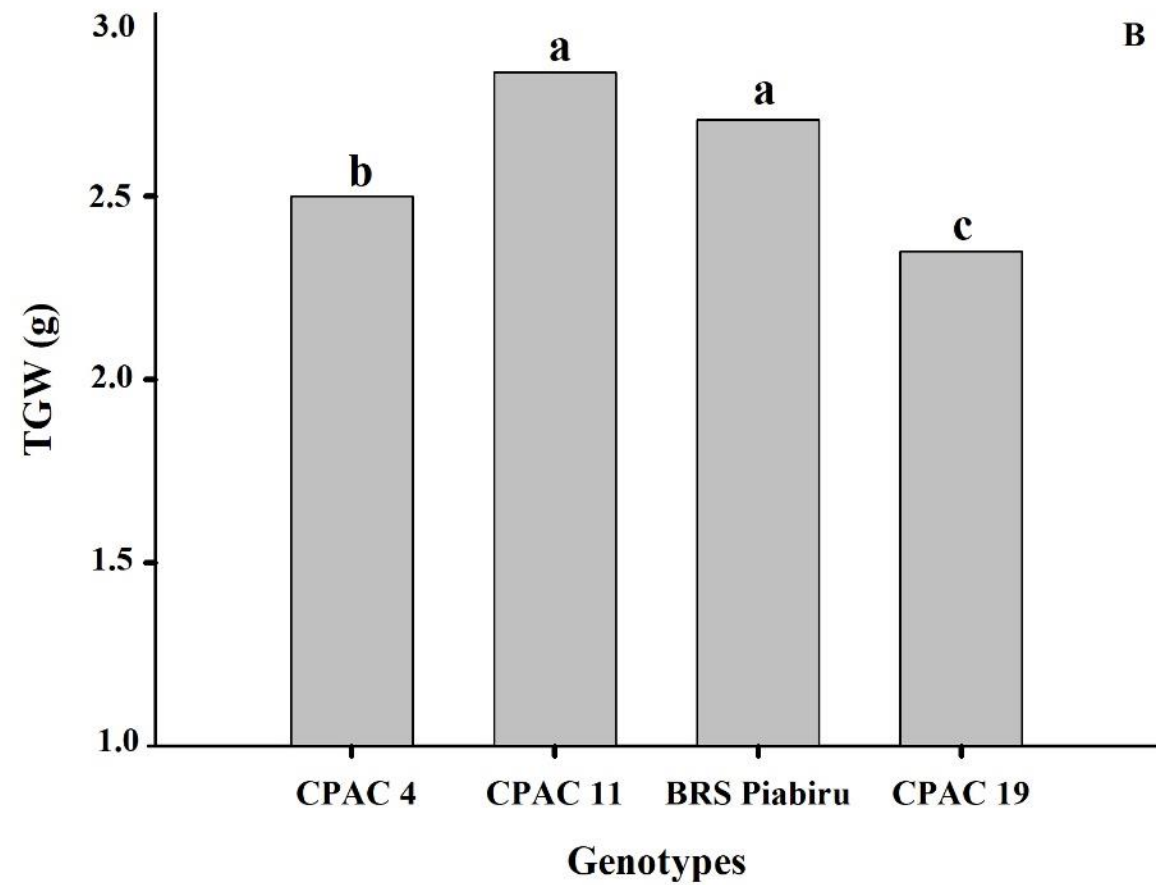

Supplement: s1 [file s1]

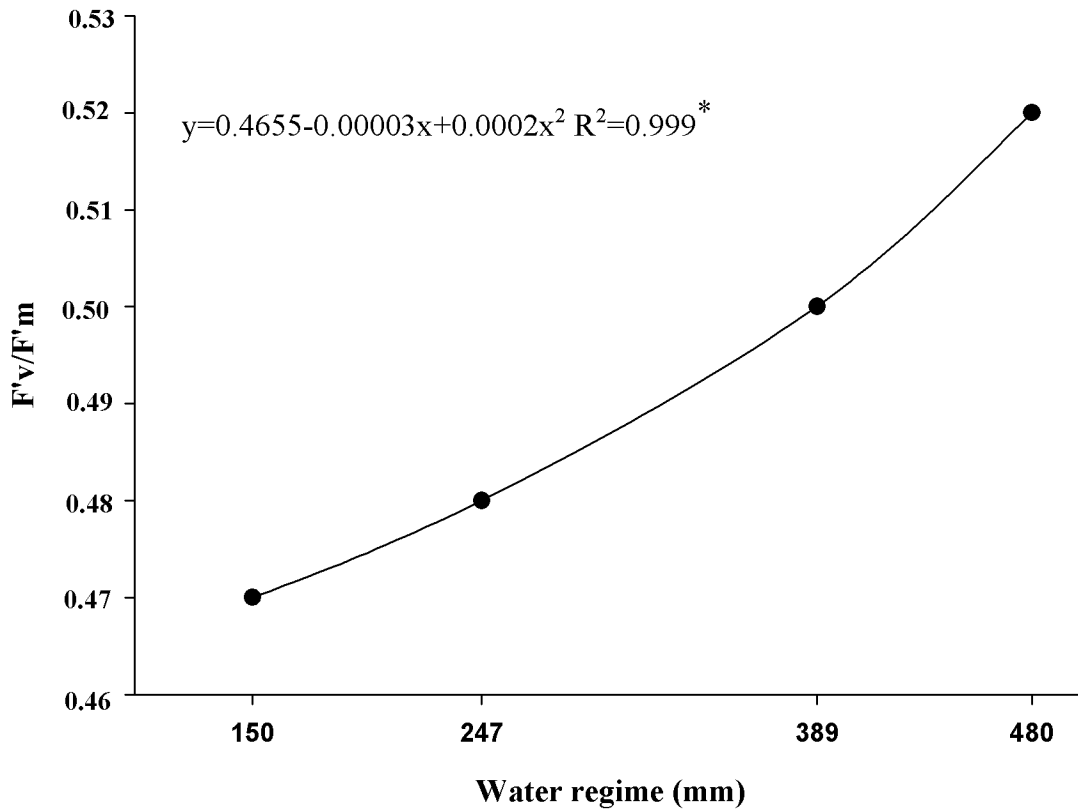

Supplement: s1 [file s1]

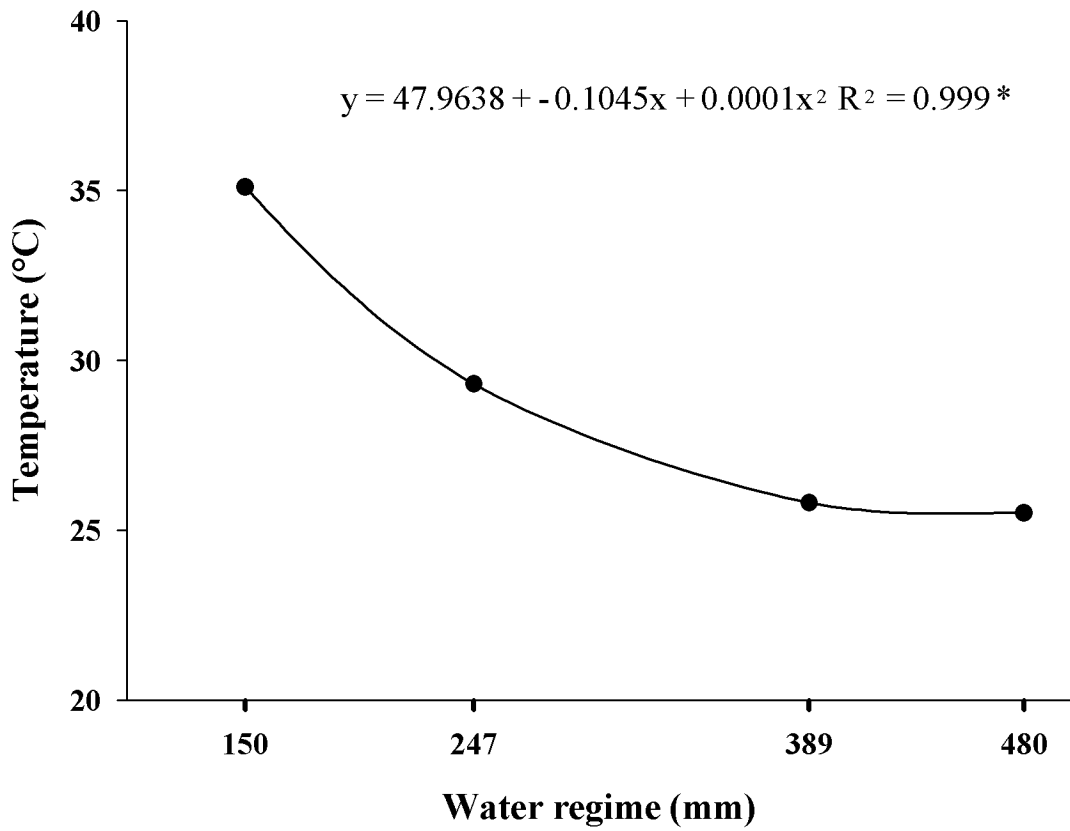

Supplement: s1 [file s1]
